# Supplementary material for: One Step Nucleic Acid Amplification (OSNA) Lysate Samples Are Suitable to Establish a Transcriptional Metastatic Signature in Patients with Early Stage Hormone Receptors-Positive Breast Cancer
Source: MDPI journal article supplement (doi:10.3390/cancers14235855), 2022-11-28
Supplement: s1 [file s1]

**Table S6.** Normalized expression levels of the 11 genes identified as differentially expressed, comparing pN0, pN1mi and pN1.

|                       | pN0<br>N = 16       | pN1mi<br>N = 7      | pN1<br>N = 9          |
|-----------------------|---------------------|---------------------|-----------------------|
| <b><i>KRT7</i></b>    |                     |                     |                       |
| Minimum               | 0.0                 | 0.0                 | 69.5                  |
| Maximum               | 43.5                | 545.2               | 20 760.6              |
| Mean $\pm$ SD         | 8.3 $\pm$ 12.2      | 142.6 $\pm$ 238.8   | 4 519.0 $\pm$ 7 006.0 |
| <b><i>VTCN1</i></b>   |                     |                     |                       |
| Minimum               | 0.0                 | 0.0                 | 1.2                   |
| Maximum               | 0.0                 | 71.5                | 1 050.5               |
| Mean $\pm$ SD         | 0.0 $\pm$ 0.0       | 10.9 $\pm$ 26.8     | 158.7 $\pm$ 343.8     |
| <b><i>CD44</i></b>    |                     |                     |                       |
| Minimum               | 0.0                 | 2.4                 | 8.3                   |
| Maximum               | 14.8                | 25.4                | 6 361.5               |
| Mean $\pm$ SD         | 7.4 $\pm$ 4.1       | 12.0 $\pm$ 8.4      | 929.0 $\pm$ 2 050.4   |
| <b><i>GATA3</i></b>   |                     |                     |                       |
| Minimum               | 280.8               | 425.9               | 666.2                 |
| Maximum               | 934.9               | 1 773.2             | 17 988.7              |
| Mean $\pm$ SD         | 560.4 $\pm$ 190.6   | 783.6 $\pm$ 484.6   | 5 338.1 $\pm$ 5 460.9 |
| <b><i>ALOX15B</i></b> |                     |                     |                       |
| Minimum               | 0.8                 | 1.8                 | 5.8                   |
| Maximum               | 43.4                | 33.1                | 461.5                 |
| Mean $\pm$ SD         | 11.6 $\pm$ 10.5     | 12.1 $\pm$ 10.3     | 106.9 $\pm$ 144.9     |
| <b><i>RORC</i></b>    |                     |                     |                       |
| Minimum               | 78.2                | 92.0                | 147.4                 |
| Maximum               | 141.9               | 188.4               | 1 862.0               |
| Mean $\pm$ SD         | 107.5 $\pm$ 17.7    | 136.6 $\pm$ 33.7    | 554.4 $\pm$ 591.3     |
| <b><i>NECTIN2</i></b> |                     |                     |                       |
| Minimum               | 48.7                | 99.5                | 136.3                 |
| Maximum               | 231.2               | 203.5               | 2 049.8               |
| Mean $\pm$ SD         | 131.3 $\pm$ 51.7    | 168.4 $\pm$ 41.4    | 641.4 $\pm$ 617.0     |
| <b><i>LRG1</i></b>    |                     |                     |                       |
| Minimum               | 20.6                | 15.8                | 61.2                  |
| Maximum               | 245.7               | 145.8               | 2 210.4               |
| Mean $\pm$ SD         | 70.3 $\pm$ 54.5     | 95.0 $\pm$ 41.4     | 586.9 $\pm$ 765.4     |
| <b><i>CD276</i></b>   |                     |                     |                       |
| Minimum               | 35.6                | 46.5                | 48.7                  |
| Maximum               | 127.7               | 155.2               | 875.7                 |
| Mean $\pm$ SD         | 72.0 $\pm$ 28.2     | 92.1 $\pm$ 36.6     | 247.6 $\pm$ 260.1     |
| <b><i>FOXM1</i></b>   |                     |                     |                       |
| Minimum               | 52.5                | 61.7                | 107.5                 |
| Maximum               | 182.5               | 230.7               | 1 463.6               |
| Mean $\pm$ SD         | 112.2 $\pm$ 35.9    | 110.7 $\pm$ 56.2    | 367.5 $\pm$ 423.1     |
| <b><i>IGF1R</i></b>   |                     |                     |                       |
| Minimum               | 645.2               | 823.8               | 794.1                 |
| Maximum               | 2 090.1             | 1 777.4             | 11 664.7              |
| Mean $\pm$ SD         | 1 241.1 $\pm$ 382.5 | 1 237.7 $\pm$ 290.7 | 3 768.6 $\pm$ 3 344.0 |

SD –Standard deviation.
