# Supplementary material for: One Step Nucleic Acid Amplification (OSNA) Lysate Samples Are Suitable to Establish a Transcriptional Metastatic Signature in Patients with Early Stage Hormone Receptors-Positive Breast Cancer
Source: MDPI journal article supplement (doi:10.3390/cancers14235855), 2022-11-28
Supplement: s1 [file s1]

**Table S4.** Genes differentially expressed between OSNA positive SLNs with macrometastases (pN1) and OSNA positive SLNs with micrometastases (pN1mi).

| Gene symbol *  | Gene name *                         | Log2 Fold Change | Fold Change | p-value | FDR p-value |
|----------------|-------------------------------------|------------------|-------------|---------|-------------|
| <i>CD44</i>    | CD44 molecule (Indian blood group)  | 6.27             | 77.2        | <0.001  | <0.001      |
| <i>KRT7</i>    | Keratin 7                           | 4.99             | 31.8        | <0.001  | 0.012       |
| <i>ALOX15B</i> | Arachidonate 15-lipoxygenase type B | 3.14             | 8.8         | <0.001  | 0.012       |
| <i>GATA3</i>   | GATA Binding protein 3              | 2.77             | 6.8         | <0.001  | <0.001      |
| <i>LRG1</i>    | Leucine rich alpha-2-glycoprotein 1 | 2.63             | 6.2         | <0.001  | 0.024       |
| <i>RORC</i>    | RAR related orphan receptor C       | 2.02             | 4.1         | <0.001  | 0.012       |
| <i>NECTIN2</i> | Nectin cell adhesion molecule 2     | 1.93             | 3.8         | <0.001  | 0.029       |

\*According to HGNC (HUGO Gene Nomenclature Committee).
