# Supplementary material for: One Step Nucleic Acid Amplification (OSNA) Lysate Samples Are Suitable to Establish a Transcriptional Metastatic Signature in Patients with Early Stage Hormone Receptors-Positive Breast Cancer
Source: MDPI journal article supplement (doi:10.3390/cancers14235855), 2022-11-28
Supplement: s1 [file s1]

**Table S5.** Genes differentially expressed between OSNA positive SLNs (pN1 and pN1mi) and OSNA negative SLNs (pN0).

| Gene symbol *  | Gene name *                                           | Log2 Fold Change | Fold Change | <i>p</i> -value | FDR <i>p</i> -value |
|----------------|-------------------------------------------------------|------------------|-------------|-----------------|---------------------|
| <i>KRT7</i>    | Keratin 7                                             | 8.30             | 315.2       | <0.001          | <0.001              |
| <i>VTCN1</i>   | V-set domain containing T cell activation inhibitor 1 | 7.33             | 160.9       | <0.001          | <0.001              |
| <i>CD44</i>    | CD44 molecule (Indian blood group)                    | 4.13             | 17.5        | <0.001          | <0.001              |
| <i>GATA3</i>   | GATA Binding protein 3                                | 2.58             | 6.0         | <0.001          | <0.001              |
| <i>ALOX15B</i> | Arachidonate 15-lipoxygenase type B                   | 2.50             | 5.7         | <0.001          | 0.040               |
| <i>RORC</i>    | RAR related orphan receptor C                         | 1.79             | 3.5         | <0.001          | 0.025               |
| <i>NECTIN2</i> | Nectin cell adhesion molecule 2                       | 1.72             | 3.3         | <0.001          | 0.042               |

\*According to HGNC (HUGO Gene Nomenclature Committee).
