# Supplementary material for: One Step Nucleic Acid Amplification (OSNA) Lysate Samples Are Suitable to Establish a Transcriptional Metastatic Signature in Patients with Early Stage Hormone Receptors-Positive Breast Cancer
Source: MDPI journal article supplement (doi:10.3390/cancers14235855), 2022-11-28
Supplement: s1 [file s1]

Table S2 – Individualized sample results

| Sample | CK19 mRNA copies/ $\mu$ L<br>in the selected sample | Number of<br>removed SLNs | Number of<br>positive SLNs | TTL     | Total number<br>of positive<br>LNs<br>(sentinel and<br>non-sentinel) |  | TILs<br>(%) | Cluster |
|--------|-----------------------------------------------------|---------------------------|----------------------------|---------|----------------------------------------------------------------------|--|-------------|---------|
|        |                                                     |                           |                            |         |                                                                      |  |             |         |
| S1     | <160                                                | 3                         | 0                          |         | 0                                                                    |  | 50          | 3       |
| S2     | <160                                                | 3                         | 0                          |         | 0                                                                    |  | 30          | 3       |
| S3     | 400                                                 | 3                         | 1                          | 400     | 1                                                                    |  | 5           | 3       |
| S4     | <160                                                | 1                         | 0                          |         | 0                                                                    |  | 80          | 3       |
| S5     | 8 200                                               | 1                         | 1                          | 8 200   | 1                                                                    |  | 60          | 3       |
| S6     | 280                                                 | 1                         | 1                          | 280     | 1                                                                    |  |             | 3       |
| S7     | <160                                                | 1                         | 0                          |         | 0                                                                    |  | 5           | 3       |
| S8     | 620                                                 | 2                         | 1                          | 620     | 1                                                                    |  | 20          | 3       |
| S9     | 300                                                 | 3                         | 1                          | 300     | 1                                                                    |  | 5           | 3       |
| S10    | 62 000                                              | 4                         | 2                          | 62 950  | 2                                                                    |  | 40          | 2       |
| S11    | 4 500                                               | 1                         | 1                          | 4 500   | 1                                                                    |  | 80          | 2       |
| S12    | <160                                                | 1                         | 0                          |         | 0                                                                    |  | 5           | 3       |
| S13    | <160                                                | 1                         | 0                          |         | 0                                                                    |  | 85          | 3       |
| s14    | <160                                                | 3                         | 0                          |         | 0                                                                    |  | 20          | 3       |
| s15    | <160                                                | 1                         | 0                          |         | 0                                                                    |  | 25          | 3       |
| s16    | 3 300                                               | 1                         | 1                          | 3 300   | 1                                                                    |  | 70          | 3       |
| s17    | 430 000                                             | 1                         | 1                          | 430 000 | 2                                                                    |  | 50          | 2       |
| s18    | <160                                                | 1                         | 0                          |         | 0                                                                    |  | 50          | 3       |
| s19    | 730 000                                             | 1                         | 1                          | 730 000 | 7                                                                    |  | 10          | 1       |
| s20    | 290 000                                             | 2                         | 1                          | 322 000 | 2                                                                    |  | 10          | 2       |
| s21    | 360                                                 | 3                         | 1                          | 360     | 1                                                                    |  | 5           | 3       |
| s22    | 33 000                                              | 1                         | 1                          | 33 000  | 1                                                                    |  | 60          | 2       |

|     |         |   |   |         |   |    |   |
|-----|---------|---|---|---------|---|----|---|
| s23 | <160    | 2 | 0 |         | 0 | 5  | 3 |
| s24 | 12 000  | 2 | 1 | 21 900  | 3 | 30 | 1 |
| s25 | 300 000 | 1 | 1 | 300 000 | 1 | 20 | 2 |
| s26 | 22 000  | 2 | 1 | 22 000  | 1 | 15 | 2 |
| s27 | <160    | 1 | 0 |         | 0 | 15 | 3 |
| s28 | <160    | 2 | 0 |         | 0 | 5  | 3 |
| s29 | <160    | 2 | 0 |         | 0 | 0  | 3 |
| s30 | <160    | 2 | 0 |         | 0 | 15 | 3 |
| s31 | <160    | 1 | 0 |         | 0 | 70 | 3 |
| s32 | <160    | 2 | 0 |         | 0 | 10 | 3 |

---
