# Supplementary material for: One Step Nucleic Acid Amplification (OSNA) Lysate Samples Are Suitable to Establish a Transcriptional Metastatic Signature in Patients with Early Stage Hormone Receptors-Positive Breast Cancer
Source: MDPI journal article supplement (doi:10.3390/cancers14235855), 2022-11-28
Supplement: s1 [file s1]

**Table S3.** Genes differentially expressed between OSNA positive SLNs with macrometastases (pN1) and OSNA negative SLNs (pN0).

| Gene symbol *  | Gene name *                                           | Log2 Fold Change | Fold Change | <i>p</i> -value | FDR <i>p</i> -value |
|----------------|-------------------------------------------------------|------------------|-------------|-----------------|---------------------|
| <i>VTCN1</i>   | V-set domain containing T cell activation inhibitor 1 | 9.81             | 897.6       | <0.001          | <0.001              |
| <i>KRT7</i>    | Keratin 7                                             | 9.10             | 548.7       | <0.001          | <0.001              |
| <i>CD44</i>    | CD44 molecule (Indian blood group)                    | 6.95             | 123.6       | <0.001          | <0.001              |
| <i>GATA3</i>   | GATA Binding protein 3                                | 3.25             | 9.5         | <0.001          | <0.001              |
| <i>ALOX15B</i> | Arachidonate 15-lipoxygenase type B                   | 3.21             | 9.3         | <0.001          | <0.001              |
| <i>LRG1</i>    | Leucine rich alpha-2-glycoprotein 1                   | 3.06             | 8.3         | <0.001          | <0.001              |
| <i>RORC</i>    | RAR related orphan receptor C                         | 2.37             | 5.2         | <0.001          | <0.001              |
| <i>NECTIN2</i> | Nectin cell adhesion molecule 2                       | 2.29             | 4.9         | <0.001          | <0.001              |
| <i>CD276</i>   | CD276 molecule                                        | 1.78             | 3.4         | <0.001          | <0.001              |
| <i>FOXM1</i>   | Forkhead box M1                                       | 1.71             | 3.3         | <0.001          | 0.016               |
| <i>IGF1R</i>   | Insulin like growth factor 1 receptor                 | 1.60             | 3.0         | <0.001          | 0.016               |

\*According to HGNC (HUGO Gene Nomenclature Committee).
