# Supplementary material for: One Step Nucleic Acid Amplification (OSNA) Lysate Samples Are Suitable to Establish a Transcriptional Metastatic Signature in Patients with Early Stage Hormone Receptors-Positive Breast Cancer
Source: MDPI journal article supplement (doi:10.3390/cancers14235855), 2022-11-28
Supplement: s1 [file s1]

Table SI - Gene List - Oncomine Immune Response Research Assay

| Gene           | Target           | NCBI NAME                                          | NCBI ACCESSION | GENE FUNCTION                |
|----------------|------------------|----------------------------------------------------|----------------|------------------------------|
| <b>ABCF1</b>   | ABCF1_11741283   | ATP_binding_cassette_subfamily_F_member_1          | NM_001025091   | Housekeeping                 |
| <b>ADGRE5</b>  | ADGRE5_26552764  | adhesion_G_protein-coupled_receptor_E5             | NM_078481      | Adhesion, migration          |
| <b>ADORA2A</b> | ADORA2A_771873   | adenosine_A2a_receptor                             | NM_000675      | Checkpoint pathway           |
| <b>AIF1</b>    | AIF1_385491      | allograft_inflammatory_factor_1                    | NM_001623      | Macrophage                   |
| <b>AKT1</b>    | AKT1_358467      | AKT_serine_threonine_kinase_1                      | NM_001014431   | Tumor marker                 |
| <b>ALOX15B</b> | ALOX15B_13391445 | arachidonate_15-lipoxygenase_type_B                | NM_001141      | Macrophage                   |
| <b>ARG1</b>    | ARG1_174278      | arginase_1                                         | NM_000045      | Myeloid marker               |
| <b>AXL</b>     | AXL_24872596     | AXL_receptor_tyrosine_kinase                       | NM_021913      | Innate immune response       |
| <b>B3GAT1</b>  | B3GAT1_170280    | beta-13-glucuronyltransferase_1                    | NM_018644      | NK activation                |
| <b>BAGE</b>    | BAGE_153290      | B_melanoma_antigen                                 | NM_182482      | Tumor antigen                |
| <b>BATF</b>    | BATF_237345      | basic_leucine_zipper_ATF-like_transcription_factor | NM_006399      | Helper T cells               |
| <b>BCL2</b>    | BCL2_10401144    | B-cell_CLL_lymphoma_2                              | NM_000633      | Apoptosis                    |
| <b>BCL2L11</b> | BCL2L11_620729   | BCL2_like_11                                       | NM_138621      | Apoptosis                    |
| <b>BCL6</b>    | BCL6_21502257    | B-cell_CLL_lymphoma_6                              | NM_001706      | Type II interferon signaling |
| <b>BRCA1</b>   | BRCA1_42344338   | BRCA1_DNA_repair_associated                        | NM_007300      | Tumor marker                 |
| <b>BRCA2</b>   | BRCA2_98179922   | BRCA2_DNA_repair_associated                        | NM_000059      | Tumor marker                 |

|                 |                 |                                                 |              |                             |
|-----------------|-----------------|-------------------------------------------------|--------------|-----------------------------|
| <b>BST2</b>     | BST2_218322     | bone_marrow_stromal_cell_antigen_2              | NM_004335    | Type I interferon signaling |
| <b>BTLA</b>     | BTLA_227334     | B_and_T_lymphocyte_associated                   | NM_181780    | Checkpoint pathway          |
| <b>BUB1</b>     | BUB1_701803     | BUB1_mitotic_checkpoint_serine_threonine_kinase | NM_004336    | Proliferation               |
| <b>C10orf54</b> | C10orf54_562672 | chromosome_10_open_reading_frame_54             | NM_022153    | Checkpoint pathway          |
| <b>C1QA</b>     | C1QA_67171      | complement_component_1_q_subcomponent_A_chain   | NM_015991    | Innate immune response      |
| <b>C1QB</b>     | C1QB_111199     | complement_component_1_q_subcomponent_B_chain   | NM_000491    | Innate immune response      |
| <b>CA4</b>      | CA4_420530      | carbonic_anhydrase_4                            | NM_000717    | Neutrophil                  |
| <b>CBLB</b>     | CBLB_296407     | Cbl_proto-oncogene_B                            | NM_170662    | T cell receptor signaling   |
| <b>CCL17</b>    | CCL17_288394    | C-C_motif_chemokine_ligand_17                   | NM_002987    | Chemokine signaling         |
| <b>CCL18</b>    | CCL18_198296    | C-C_motif_chemokine_ligand_18                   | NM_002988    | Lymphocyte infiltrate       |
| <b>CCL2</b>     | CCL2_242346     | C-C_motif_chemokine_ligand_2                    | NM_002982    | Lymphocyte infiltrate       |
| <b>CCL20</b>    | CCL20_297403    | C-C_motif_chemokine_ligand_20                   | NM_004591    | Chemokine signaling         |
| <b>CCL21</b>    | CCL21_432539    | C-C_motif_chemokine_ligand_21                   | NM_002989    | Lymphocyte infiltrate       |
| <b>CCL22</b>    | CCL22_79185     | C-C_motif_chemokine_ligand_22                   | NM_002990    | Chemokine signaling         |
| <b>CCL3</b>     | CCL3_238343     | C-C_motif_chemokine_ligand_3                    | NM_002983    | Lymphocyte infiltrate       |
| <b>CCL4</b>     | CCL4_121220     | C-C_motif_chemokine_ligand_4                    | NM_002984    | Lymphocyte infiltrate       |
| <b>CCL5</b>     | CCL5_110219     | C-C_motif_chemokine_ligand_5                    | NM_002985    | Lymphocyte infiltrate       |
| <b>CCNB2</b>    | CCNB2_9861095   | cyclin_B2                                       | NM_004701    | Proliferation               |
| <b>CCR1</b>     | CCR1_54149      | C-C_motif_chemokine_receptor_1                  | NM_001295    | Cytokine signaling          |
| <b>CCR2</b>     | CCR2_385483     | C-C_motif_chemokine_receptor_2                  | NM_001123396 | Helper T cells              |
| <b>CCR4</b>     | CCR4_76182      | C-C_motif_chemokine_receptor_4                  | NM_005508    | Chemokine signaling         |
| <b>CCR5</b>     | CCR5_85193      | C-C_motif_chemokine_receptor_5_gene_pseudogene  | NM_001100168 | Lymphocyte infiltrate       |
| <b>CCR6</b>     | CCR6_271363     | C-C_motif_chemokine_receptor_6                  | NM_004367    | Chemokine signaling         |
| <b>CCR7</b>     | CCR7_133237     | C-C_motif_chemokine_receptor_7                  | NM_001838    | TCR coexpression            |

|              |                    |                |              |                               |
|--------------|--------------------|----------------|--------------|-------------------------------|
| <b>CD14</b>  | CD14_329435        | CD14_molecule  | NM_000591    | Dendritic cell,<br>macrophage |
| <b>CD160</b> | CD160_194300       | CD160_molecule | NM_007053    | Checkpoint pathway            |
| <b>CD163</b> | CD163_214222<br>45 | CD163_molecule | NM_004244    | Macrophage                    |
| <b>CD19</b>  | CD19_1201131<br>7  | CD19_molecule  | NM_001178098 | B cell marker                 |
| <b>CD1C</b>  | CD1C_1253135<br>7  | CD1c_molecule  | NM_001765    | Antigen presentation          |
| <b>CD1D</b>  | CD1D_1066117<br>3  | CD1d_molecule  | NM_001766    | Antigen presentation          |
| <b>CD2</b>   | CD2_350452         | CD2_molecule   | NM_001767    | Lymphocyte infiltrate         |
| <b>CD209</b> | CD209_992110<br>1  | CD209_molecule | NM_021155    | Dendritic cell,<br>macrophage |
| <b>CD22</b>  | CD22_1025113<br>2  | CD22_molecule  | NM_001771    | B cell marker                 |
| <b>CD226</b> | CD226_902100<br>6  | CD226_molecule | NM_006566    | Adhesion, migration           |
| <b>CD244</b> | CD244_868973       | CD244_molecule | NM_001166663 | Checkpoint pathway            |
| <b>CD247</b> | CD247_152252       | CD247_molecule | NM_198053    | TCR coexpression              |
| <b>CD27</b>  | CD27_409517        | CD27_molecule  | NM_001242    | Drug target                   |
| <b>CD274</b> | CD274_461569       | CD274_molecule | NM_014143    | Checkpoint pathway            |
| <b>CD276</b> | CD276_120113<br>10 | CD276_molecule | NM_001024736 | Checkpoint pathway            |
| <b>CD28</b>  | CD28_601704        | CD28_molecule  | NM_006139    | Checkpoint pathway            |
| <b>CD33</b>  | CD33_387493        | CD33_molecule  | NM_001772    | Myeloid marker                |
| <b>CD37</b>  | CD37_496605        | CD37_molecule  | NM_001774    | Lymphocyte infiltrate         |
| <b>CD38</b>  | CD38_519628        | CD38_molecule  | NM_001775    | Adhesion, migration           |
| <b>CD3D</b>  | CD3D_400503        | CD3d_molecule  | NM_000732    | TCR coexpression              |
| <b>CD3E</b>  | CD3E_677780        | CD3e_molecule  | NM_000733    | TCR coexpression              |

|               |               |                                      |              |                           |
|---------------|---------------|--------------------------------------|--------------|---------------------------|
| <b>CD3G</b>   | CD3G_616717   | CD3g_molecule                        | NM_000073    | TCR coexpression          |
| <b>CD4</b>    | CD4_147255    | CD4_molecule                         | NM_000616    | Helper T cells            |
| <b>CD40</b>   | CD40_300407   | CD40_molecule                        | NM_001250    | Drug target               |
| <b>CD40LG</b> | CD40LG_479579 | CD40_ligand                          | NM_000074    | T cell receptor signaling |
| <b>CD44</b>   | CD44_10151123 | CD44_molecule_Indian_blood_group     | NM_000610    | Adhesion, migration       |
| <b>CD47</b>   | CD47_826931   | CD47_molecule                        | NM_001777    | Adhesion, migration       |
| <b>CD48</b>   | CD48_695798   | CD48_molecule                        | NM_001778    | Checkpoint pathway        |
| <b>CD52</b>   | CD52_70175    | CD52_molecule                        | NM_001803    | Lymphocyte infiltrate     |
| <b>CD53</b>   | CD53_28133    | CD53_molecule                        | NM_001040033 | Adhesion, migration       |
| <b>CD6</b>    | CD6_17771886  | CD6_molecule                         | NM_006725    | TCR coexpression          |
| <b>CD63</b>   | CD63_692800   | CD63_molecule                        | NM_001780    | Lymphocyte infiltrate     |
| <b>CD68</b>   | CD68_172280   | CD68_molecule                        | NM_001251    | Macrophage                |
| <b>CD69</b>   | CD69_195303   | CD69_molecule                        | NM_001781    | Checkpoint pathway        |
| <b>CD70</b>   | CD70_259363   | CD70_molecule                        | NM_001252    | Drug target               |
| <b>CD74</b>   | CD74_787896   | CD74_molecule                        | NM_001025159 | Antigen processing        |
| <b>CD79A</b>  | CD79A_184290  | CD79a_molecule                       | NM_001783    | B cell receptor signaling |
| <b>CD79B</b>  | CD79B_484590  | CD79b_molecule                       | NM_001039933 | B cell receptor signaling |
| <b>CD80</b>   | CD80_457557   | CD80_molecule                        | NM_005191    | Checkpoint pathway        |
| <b>CD83</b>   | CD83_480580   | CD83_molecule                        | NM_004233    | Antigen presentation      |
| <b>CD86</b>   | CD86_169267   | CD86_molecule                        | NM_175862    | Checkpoint pathway        |
| <b>CD8A</b>   | CD8A_14271531 | CD8a_molecule                        | NM_171827    | TCR coexpression          |
| <b>CD8B</b>   | CD8B_403510   | CD8b_molecule                        | NM_172213    | TCR coexpression          |
| <b>CDK1</b>   | CDK1_837939   | cyclin-dependent_kinase_1            | NM_001786    | Proliferation             |
| <b>CDKN2A</b> | CDKN2A_696829 | cyclin-dependent_kinase_inhibitor_2A | NM_000077    | Tumor marker              |

|                |                  |                                                           |                 |                              |
|----------------|------------------|-----------------------------------------------------------|-----------------|------------------------------|
| <b>CDKN3</b>   | CDKN3_434534     | cyclin-dependent_kinase_inhibitor_3                       | NM_005192       | Proliferation                |
| <b>CEACAM1</b> | CEACAM1_10471155 | carcinoembryonic_antigen_related_cell_adhesion_molecule_1 | NM_001712       | Checkpoint pathway           |
| <b>CEACAM8</b> | CEACAM8_745847   | carcinoembryonic_antigen_related_cell_adhesion_molecule_8 | NM_001816       | Myeloid marker               |
| <b>CIITA</b>   | CIITA_294397     | class_II_major_histocompatibility_complex_transactivator  | NM_000246       | Type II interferon signaling |
| <b>CLEC4C</b>  | CLEC4C_322429    | C-type_lectin_domain_family_4_member_C                    | NM_130441       | Dendritic cell               |
| <b>CMKLR1</b>  | CMKLR1_36143     | chemerin_chemokine-like_receptor_1                        | NM_001142345    | Dendritic cell, macrophage   |
| <b>CORO1A</b>  | CORO1A_457563    | coronin_1A                                                | NM_007074       | Lymphocyte infiltrate        |
| <b>CRTAM</b>   | CRTAM_312417     | cytotoxic_and_regulatory_T-cell_molecule                  | NM_019604       | TCR coexpression             |
| <b>CSF1R</b>   | CSF1R_19612067   | colony_stimulating_factor_1_receptor                      | NM_005211       | Cytokine signaling           |
| <b>CSF2RB</b>  | CSF2RB_11971301  | colony_stimulating_factor_2_receptor_beta_common_subunit  | NM_000395       | Cytokine signaling           |
| <b>CTAG1B</b>  | CTAG1B_276373    | cancer_testis_antigen_1B                                  | NM_001327       | Tumor antigen                |
| <b>CTAG2</b>   | CTAG2_407763     | cancer_testis_antigen_2                                   | ENST00000369585 | Tumor antigen                |
| <b>CTLA4</b>   | CTLA4_584689     | cytotoxic_T-lymphocyte_associated_protein_4               | NM_005214       | Drug target                  |
| <b>CTSS</b>    | CTSS_356460      | cathepsin_S                                               | NM_004079       | Lymphocyte infiltrate        |
| <b>CX3CL1</b>  | CX3CL1_190298    | C-X3-C_motif_chemokine_ligand_1                           | NM_002996       | Type II interferon signaling |
| <b>CX3CR1</b>  | CX3CR1_35133     | C-X3-C_motif_chemokine_receptor_1                         | NM_001337       | Lymphocyte infiltrate        |
| <b>CX3CR1</b>  | CX3CR1_147243    | C-X3-C_motif_chemokine_receptor_1                         | NM_001171172    | Lymphocyte infiltrate        |
| <b>CX3CR1</b>  | CX3CR1_207292    | C-X3-C_motif_chemokine_receptor_1                         | NM_001171171    | Lymphocyte infiltrate        |

|               |                |                                     |              |                              |
|---------------|----------------|-------------------------------------|--------------|------------------------------|
| <b>CX3CR1</b> | CX3CR1_58187   | C-X3-C_motif_chemokine_receptor_1   | NM_001171174 | Lymphocyte infiltrate        |
| <b>CXCL1</b>  | CXCL1_357459   | C-X-C_motif_chemokine_ligand_1      | NM_001511    | Chemokine signaling          |
| <b>CXCL10</b> | CXCL10_354459  | C-X-C_motif_chemokine_ligand_10     | NM_001565    | Type II interferon signaling |
| <b>CXCL11</b> | CXCL11_261361  | C-X-C_motif_chemokine_ligand_11     | NM_005409    | Type II interferon signaling |
| <b>CXCL13</b> | CXCL13_202307  | C-X-C_motif_chemokine_ligand_13     | NM_006419    | Type II interferon signaling |
| <b>CXCL8</b>  | CXCL8_197302   | C-X-C_motif_chemokine_ligand_8      | NM_000584    | Cytokine signaling           |
| <b>CXCL9</b>  | CXCL9_149250   | C-X-C_motif_chemokine_ligand_9      | NM_002416    | Type II interferon signaling |
| <b>CXCR2</b>  | CXCR2_379486   | C-X-C_motif_chemokine_receptor_2    | NM_001557    | Chemokine signaling          |
| <b>CXCR3</b>  | CXCR3_11138    | C-X-C_motif_chemokine_receptor_3    | NM_001504    | Chemokine signaling          |
| <b>CXCR4</b>  | CXCR4_100208   | C-X-C_motif_chemokine_receptor_4    | NM_003467    | Lymphocyte infiltrate        |
| <b>CXCR5</b>  | CXCR5_153252   | C-X-C_motif_chemokine_receptor_5    | NM_001716    | Type II interferon signaling |
| <b>CXCR6</b>  | CXCR6_48153    | C-X-C_motif_chemokine_receptor_6    | NM_006564    | Lymphocyte infiltrate        |
| <b>CYBB</b>   | CYBB_14221529  | cytochrome_b-245_beta_chain         | NM_000397    | Type II interferon signaling |
| <b>DDX58</b>  | DDX58_540643   | DEXD_H-box_helicase_58              | NM_014314    | Interferon signaling         |
| <b>DGAT2</b>  | DGAT2_439548   | diacylglycerol_O-acyltransferase_2  | NM_032564    | Neutrophil                   |
| <b>DMBT1</b>  | DMBT1_64696575 | deleted_in_malignant_brain_tumors_1 | NM_007329    | Innate immune response       |
| <b>EBI3</b>   | EBI3_527636    | Epstein-Barr_virus_induced_3        | NM_005755    | T cell regulation            |
| <b>EFNA4</b>  | EFNA4_548649   | ephrin_A4                           | NM_005227    | Tumor marker                 |
| <b>EGFR</b>   | EGFR_31583261  | epidermal_growth_factor_receptor    | NM_005228    | Tumor marker                 |
| <b>EGR2</b>   | EGR2_454559    | early_growth_response_2             | NM_000399    | T cell differentiation       |
| <b>EGR3</b>   | EGR3_411516    | early_growth_response_3             | NM_004430    | Tumor marker                 |

|                |                |                                                           |              |                              |
|----------------|----------------|-----------------------------------------------------------|--------------|------------------------------|
| <b>EIF2AK2</b> | EIF2AK2_257357 | eukaryotic_translation_initiation_factor_2_alpha_kinase_2 | NM_001135651 | Type II interferon signaling |
| <b>ENTPD1</b>  | ENTPD1_708815  | ectonucleoside_triphosphate_diphosphohydrolase_1          | NM_001098175 | Checkpoint pathway           |
| <b>EOMES</b>   | EOMES_9391044  | eomesodermin                                              | NM_005442    | Checkpoint pathway           |
| <b>FAS</b>     | FAS_473575     | Fas_cell_surface_death_receptor                           | NM_000043    | B cell receptor signaling    |
| <b>FASLG</b>   | FASLG_417521   | Fas_ligand                                                | NM_000639    | Type II interferon signaling |
| <b>FCER1G</b>  | FCER1G_31138   | Fc_fragment_of_IgE_receptor_Ig                            | NM_004106    | Lymphocyte infiltrate        |
| <b>FCGR1A</b>  | FCGR1A_547652  | Fc_fragment_of_IgG_receptor_Ia                            | NM_000566    | B cell marker                |
| <b>FCGR2B</b>  | FCGR2B_792903  | Fc_fragment_of_IgG_receptor_IIb                           | NM_004001    | B cell marker                |
| <b>FCGR3A</b>  | FCGR3A_575682  | Fc_fragment_of_IgG_receptor_IIIa                          | NM_000569    | Macrophage                   |
| <b>FCGR3B</b>  | FCGR3B_620722  | Fc_fragment_of_IgG_receptor_IIIb                          | NM_000570    | NK activation                |
| <b>FCRLA</b>   | FCRLA_710815   | Fc_receptor_like_A                                        | NM_001184866 | B cell marker                |
| <b>FOXM1</b>   | FOXM1_10551166 | forkhead_box_M1                                           | NM_021953    | Proliferation                |
| <b>FOXO1</b>   | FOXO1_9761081  | forkhead_box_O1                                           | NM_002015    | PD-1 signaling, Tumor marker |
| <b>FOXP3</b>   | FOXP3_865975   | forkhead_box_P3                                           | NM_014009    | T cell regulation            |
| <b>FUT4</b>    | FUT4_31443252  | fucosyltransferase_4                                      | NM_002033    | Myeloid marker, stem cell    |
| <b>FYB</b>     | FYB_12891393   | FYN_binding_protein                                       | NM_001465    | Lymphocyte infiltrate        |
| <b>G6PD</b>    | G6PD_10841194  | glucose-6-phosphate_dehydrogenase                         | NM_000402    | Housekeeping                 |

|                              |                       |                                                                            |                        |                              |
|------------------------------|-----------------------|----------------------------------------------------------------------------|------------------------|------------------------------|
| <b>GADD45GIP1</b>            | GADD45GIP1_3<br>29429 | GADD45G_interacting_protein_1                                              | NM_052850              | Apoptosis                    |
| <b>GAGE1,GAGE12I,GAGE12F</b> | GAGE1_144260          | G_antigen_1                                                                | NM_001468,NM_001477,NM | Tumor antigen                |
| <b>GAGE10</b>                | GAGE10_137250         | G_antigen_10                                                               | NM_001098413           | Tumor antigen                |
| <b>GAGE12J</b>               | GAGE12J_144260        | G_antigen_12J                                                              | NM_001098406           | Tumor antigen                |
| <b>GAGE13</b>                | GAGE13_116232         | G_antigen_13                                                               | NM_001098412           | Tumor antigen                |
| <b>GAGE2C,GAGE2A,GAGE2E</b>  | GAGE2C_104217         | G_antigen_2C                                                               | NM_001472,NM_001127212 | Tumor antigen                |
| <b>GATA3</b>                 | GATA3_14061514        | GATA_binding_protein_3                                                     | NM_001002295           | Helper T cells               |
| <b>GBP1</b>                  | GBP1_771872           | guanylate_binding_protein_1                                                | NM_002053              | Type II interferon signaling |
| <b>GNLY</b>                  | GNLY_251357           | granulysin                                                                 | NM_006433              | NK activation                |
| <b>GPR18</b>                 | GPR18_238340          | G_protein-coupled_receptor_18                                              | NM_001098200           | TCR coexpression             |
| <b>GRAP2</b>                 | GRAP2_283387          | GRB2-related_adaptor_protein_2                                             | NM_004810              | TCR coexpression             |
| <b>GUSB</b>                  | GUSB_17671872         | glucuronidase_beta                                                         | NM_000181              | Housekeeping                 |
| <b>GZMA</b>                  | GZMA_165265           | granzyme_A                                                                 | NM_006144              | Lymphocyte infiltrate        |
| <b>GZMB</b>                  | GZMB_581688           | granzyme_B                                                                 | NM_004131              | Lymphocyte infiltrate        |
| <b>GZMH</b>                  | GZMH_233339           | granzyme_H                                                                 | NM_033423              | Lymphocyte infiltrate        |
| <b>GZMK</b>                  | GZMK_178286           | granzyme_K                                                                 | NM_002104              | Lymphocyte infiltrate        |
| <b>HAVCR2</b>                | HAVCR2_594705         | hepatitis_A_virus_cellular_receptor_2                                      | NM_032782              | Checkpoint pathway           |
| <b>HERC6</b>                 | HERC6_17021806        | HECT_and_RLD_domain_containing_E3_ubiquitin_protein_ligase_family_member_6 | NM_017912              | Dendritic cell               |
| <b>HGF</b>                   | HGF_14151518          | hepatocyte_growth_factor                                                   | NM_000601              | Cytokine signaling           |



|                 |                 |                                                      |              |                                 |
|-----------------|-----------------|------------------------------------------------------|--------------|---------------------------------|
| <b>HIF1A</b>    | HIF1A_13371439  | hypoxia_inducible_factor_1_alpha_subunit             | NM_001530    | PD-1 signaling,<br>Tumor marker |
| <b>HLA-A</b>    | HLA-A_345445    | major_histocompatibility_complex_class_I_A           | NM_002116    | Antigen processing              |
| <b>HLA-B</b>    | HLA-B_639746    | major_histocompatibility_complex_class_I_B           | NM_005514    | Antigen processing              |
| <b>HLA-C</b>    | HLA-C_9191023   | major_histocompatibility_complex_class_I_C           | NM_002117    | Antigen processing              |
| <b>HLA-DMA</b>  | HLA-DMA_764869  | major_histocompatibility_complex_class_II_DM_alpha   | NM_006120    | Antigen processing              |
| <b>HLA-DMB</b>  | HLA-DMB_854962  | major_histocompatibility_complex_class_II_DM_beta    | NM_002118    | Antigen processing              |
| <b>HLA-DOA</b>  | HLA-DOA_55163   | major_histocompatibility_complex_class_II_DO_alpha   | NM_002119    | Antigen processing              |
| <b>HLA-DOB</b>  | HLA-DOB_182290  | major_histocompatibility_complex_class_II_DO_beta    | NM_002120    | Antigen processing              |
| <b>HLA-DPA1</b> | HLA-DPA1_129237 | major_histocompatibility_complex_class_II_DP_alpha_1 | NM_033554    | Antigen processing              |
| <b>HLA-DPB1</b> | HLA-DPB1_175280 | major_histocompatibility_complex_class_II_DP_beta_1  | NM_002121    | Antigen processing              |
| <b>HLA-DQA1</b> | HLA-DQA1_587686 | major_histocompatibility_complex_class_II_DQ_alpha_1 | NM_002122    | Antigen processing              |
| <b>HLA-DQA2</b> | HLA-DQA2_840937 | major_histocompatibility_complex_class_II_DQ_alpha_2 | NM_020056    | Antigen processing              |
| <b>HLA-DQB2</b> | HLA-DQB2_142243 | major_histocompatibility_complex_class_II_DQ_beta_2  | NM_001198858 | Antigen processing              |
| <b>HLA-DRA</b>  | HLA-DRA_186294  | major_histocompatibility_complex_class_II_DR_alpha   | NM_019111    | Antigen processing              |
| <b>HLA-DRB1</b> | HLA-DRB1_877982 | major_histocompatibility_complex_class_II_DR_beta_1  | NM_002124    | Antigen processing              |
| <b>HLA-E</b>    | HLA-E_639747    | major_histocompatibility_complex_class_I_E           | NM_005516    | Antigen processing              |
| <b>HLA-F</b>    | HLA-F_101204    | major_histocompatibility_complex_class_I_F           | NM_001098479 | Antigen processing              |

|                  |                  |                                                             |              |                              |
|------------------|------------------|-------------------------------------------------------------|--------------|------------------------------|
| <b>HLA-F-AS1</b> | HLA-F-AS1_726834 | HLA-F_antisense_RNA_1                                       | NR_026972    | Antigen processing           |
| <b>HLA-G</b>     | HLA-G_483585     | major_histocompatibility_complex_class_I_G                  | NM_002127    | Antigen processing           |
| <b>HMBS</b>      | HMBS_796904      | hydroxymethylbilane_synthase                                | NM_000190    | Housekeeping                 |
| <b>ICAM1</b>     | ICAM1_605711     | intercellular_adhesion_molecule_1                           | NM_000201    | Type II interferon signaling |
| <b>ICOS</b>      | ICOS_382487      | inducible_T-cell_costimulator                               | NM_012092    | Checkpoint pathway           |
| <b>ICOSLG</b>    | ICOSLG_483588    | inducible_T-cell_costimulator_ligand                        | NM_015259    | Checkpoint pathway           |
| <b>ID2</b>       | ID2_579679       | inhibitor_of_DNA_binding_2_HLH_protein                      | NM_002166    | T cell regulation            |
| <b>ID3</b>       | ID3_572678       | inhibitor_of_DNA_binding_3_HLH_protein                      | NM_002167    | T cell regulation            |
| <b>IDO1</b>      | IDO1_268369      | indoleamine_23-dioxygenase_1                                | NM_002164    | Drug target                  |
| <b>IDO2</b>      | IDO2_458562      | indoleamine_23-dioxygenase_2                                | NM_194294    | Checkpoint pathway           |
| <b>IFI27</b>     | IFI27_37143      | interferon_alpha_inducible_protein_27                       | NM_005532    | Type I interferon signaling  |
| <b>IFI35</b>     | IFI35_419526     | interferon_induced_protein_35                               | NM_005533    | Interferon signaling         |
| <b>IFI44L</b>    | IFI44L_12771376  | interferon_induced_protein_44_like                          | NM_006820    | Interferon signaling         |
| <b>IFI6</b>      | IFI6_47156       | interferon_alpha_inducible_protein_6                        | NM_022873    | Interferon signaling         |
| <b>IFIH1</b>     | IFIH1_20172123   | interferon_induced_with_helicase_C_domain_1                 | NM_022168    | Innate immune response       |
| <b>IFIT1</b>     | IFIT1_158259     | interferon_induced_protein_with_tetratricopeptide_repeats_1 | NM_001548    | Type I interferon signaling  |
| <b>IFIT2</b>     | IFIT2_124224     | interferon_induced_protein_with_tetratricopeptide_repeats_2 | NM_001547    | Cytokine signaling           |
| <b>IFIT3</b>     | IFIT3_72174      | interferon_induced_protein_with_tetratricopeptide_repeats_3 | NM_001031683 | Type I interferon signaling  |
| <b>IFITM1</b>    | IFITM1_359459    | interferon_induced_transmembrane_protein_1                  | NM_003641    | Type I interferon signaling  |
| <b>IFITM2</b>    | IFITM2_316422    | interferon_induced_transmembrane_protein_2                  | NM_006435    | Type I interferon signaling  |

|               |                |                                       |           |                              |
|---------------|----------------|---------------------------------------|-----------|------------------------------|
| <b>IFNA17</b> | IFNA17_691788  | interferon_alpha_17                   | NM_021268 | T cell receptor signaling    |
| <b>IFNB1</b>  | IFNB1_579686   | interferon_beta_1                     | NM_002176 | Type II interferon signaling |
| <b>IFNG</b>   | IFNG_400500    | interferon_gamma                      | NM_000619 | Type II interferon signaling |
| <b>IGF1R</b>  | IGF1R_12291338 | insulin_like_growth_factor_1_receptor | NM_000875 | Adhesion, migration          |
| <b>IGSF6</b>  | IGSF6_411515   | immunoglobulin_superfamily_member_6   | NM_005849 | Lymphocyte infiltrate        |
| <b>IKZF1</b>  | IKZF1_189301   | IKAROS_family_zinc_finger_1           | NM_006060 | Lymphocyte development       |
| <b>IKZF2</b>  | IKZF2_537639   | IKAROS_family_zinc_finger_2           | NM_016260 | Lymphocyte development       |
| <b>IKZF3</b>  | IKZF3_427534   | IKAROS_family_zinc_finger_3           | NM_012481 | TCR coexpression             |
| <b>IKZF4</b>  | IKZF4_746852   | IKAROS_family_zinc_finger_4           | NM_022465 | Lymphocyte development       |
| <b>IL10</b>   | IL10_491598    | interleukin_10                        | NM_000572 | Drug target                  |
| <b>IL10RA</b> | IL10RA_192296  | interleukin_10_receptor_subunit_alpha | NM_001558 | Lymphocyte infiltrate        |
| <b>IL12A</b>  | IL12A_739842   | interleukin_12A                       | NM_000882 | Drug target                  |
| <b>IL12B</b>  | IL12B_314422   | interleukin_12B                       | NM_002187 | Drug target                  |
| <b>IL13</b>   | IL13_268378    | interleukin_13                        | NM_002188 | Cytokine signaling           |
| <b>IL15</b>   | IL15_49155     | interleukin_15                        | NM_000585 | T cell regulation            |
| <b>IL17A</b>  | IL17A_233320   | interleukin_17A                       | NM_002190 | Helper T cells               |
| <b>IL17F</b>  | IL17F_35139    | interleukin_17F                       | NM_052872 | Dendritic cell, macrophage   |
| <b>IL18</b>   | IL18_140246    | interleukin_18                        | NM_001562 | T cell regulation            |
| <b>IL1A</b>   | IL1A_14431546  | interleukin_1_alpha                   | NM_000575 | Cytokine signaling           |
| <b>IL1B</b>   | IL1B_659766    | interleukin_1_beta                    | NM_000576 | Type II interferon signaling |
| <b>IL2</b>    | IL2_366451     | interleukin_2                         | NM_000586 | Drug target                  |

|              |                    |                                           |              |                                 |
|--------------|--------------------|-------------------------------------------|--------------|---------------------------------|
| <b>IL21</b>  | IL21_368450        | interleukin_21                            | NM_021803    | Cytokine signaling              |
| <b>IL22</b>  | IL22_263349        | interleukin_22                            | NM_020525    | T cell regulation               |
| <b>IL23A</b> | IL23A_386491       | interleukin_23_subunit_alpha              | NM_016584    | Dendritic cell,<br>macrophage   |
| <b>IL2RA</b> | IL2RA_240338       | interleukin_2_receptor_subunit_alpha      | NM_000417    | Cytokine signaling              |
| <b>IL2RB</b> | IL2RB_9991107      | interleukin_2_receptor_subunit_beta       | NM_000878    | TCR coexpression                |
| <b>IL2RG</b> | IL2RG_884988       | interleukin_2_receptor_subunit_gamma      | NM_000206    | Lymphocyte infiltrate           |
| <b>IL3RA</b> | IL3RA_465565       | interleukin_3_receptor_subunit_alpha      | NM_002183    | Dendritic cell                  |
| <b>IL4</b>   | IL4_380477         | interleukin_4                             | NM_000589    | Cytokine signaling              |
| <b>IL6</b>   | IL6_521626         | interleukin_6                             | NM_000600    | Cytokine signaling              |
| <b>IL7</b>   | IL7_545652         | interleukin_7                             | NM_000880    | Cytokine signaling              |
| <b>IL7R</b>  | IL7R_551658        | interleukin_7_receptor                    | NM_002185    | TCR coexpression                |
| <b>IRF1</b>  | IRF1_752861        | interferon_regulatory_factor_1            | NM_002198    | Type II interferon<br>signaling |
| <b>IRF4</b>  | IRF4_786895        | interferon_regulatory_factor_4            | NM_002460    | Interferon signaling            |
| <b>IRF9</b>  | IRF9_12191322      | interferon_regulatory_factor_9            | NM_006084    | Type II interferon<br>signaling |
| <b>IRS1</b>  | IRS1_37283828      | insulin_receptor_substrate_1              | NM_005544    | Tumor marker                    |
| <b>ISG15</b> | ISG15_66173        | ISG15_ubiquitin-like_modifier             | NM_005101    | Type I interferon<br>signaling  |
| <b>ISG20</b> | ISG20_642750       | interferon_stimulated_exonuclease_gene_20 | NM_002201    | Type I interferon<br>signaling  |
| <b>ITGA1</b> | ITGA1_814914       | integrin_subunit_alpha_1                  | NM_181501    | Adhesion, migration             |
| <b>ITGAE</b> | ITGAE_3375348<br>1 | integrin_subunit_alpha_E<br>1             | NM_002208    | Adhesion, migration             |
| <b>ITGAL</b> | ITGAL_535638       | integrin_subunit_alpha_L                  | NM_002209    | Leukocyte migration             |
| <b>ITGAM</b> | ITGAM_310332<br>09 | integrin_subunit_alpha_M<br>09            | NM_001145808 | Leukocyte migration             |
| <b>ITGAX</b> | ITGAX_204821<br>51 | integrin_subunit_alpha_X<br>51            | NM_000887    | Dendritic cell                  |

|                 |                      |                                                                                         |              |                                   |
|-----------------|----------------------|-----------------------------------------------------------------------------------------|--------------|-----------------------------------|
| <b>ITGB1</b>    | ITGB1_679777         | integrin_subunit_beta_1                                                                 | NM_002211    | Adhesion, migration               |
| <b>ITGB2</b>    | ITGB2_1542164<br>8   | integrin_subunit_beta_2                                                                 | NM_000211    | Lymphocyte infiltrate             |
| <b>ITGB7</b>    | ITGB7_2434254<br>4   | integrin_subunit_beta_7                                                                 | NM_000889    | Leukocyte migration               |
| <b>ITK</b>      | ITK_563669           | IL2_inducible_T-cell_kinase                                                             | NM_005546    | TCR coexpression                  |
| <b>JAML</b>     | JAML_78188           | junction_adhesion_molecule_like                                                         | NM_001098526 | Lymphocyte infiltrate             |
| <b>JCHAIN</b>   | JCHAIN_134238        | joining_chain_of_multimeric_IgA_and_IgM                                                 | NM_144646    | B cell marker                     |
| <b>KIAA0101</b> | KIAA0101_3194<br>26  | KIAA0101                                                                                | NM_014736    | Proliferation                     |
| <b>KIR2DL1</b>  | KIR2DL1_9142         | killer_cell_immunoglobulin_like_receptor_two_ig_domains_and_l<br>ong_cytoplasmic_tail_1 | NM_014218    | Drug target                       |
| <b>KIR2DL2</b>  | KIR2DL2_27126        | killer_cell_immunoglobulin_like_receptor_two_ig_domains_and_l<br>ong_cytoplasmic_tail_2 | NM_014218    | NK cell marker                    |
| <b>KIR2DL3</b>  | KIR2DL3_65475<br>7   | killer_cell_immunoglobulin_like_receptor_two_ig_domains_and_l<br>ong_cytoplasmic_tail_3 | NM_015868    | NK cell marker                    |
| <b>KLF2</b>     | KLF2_9111017         | Kruppel_like_factor_2                                                                   | NM_016270    | T cell regulation,<br>trafficking |
| <b>KLRB1</b>    | KLRB1_177284         | killer_cell_lectin_like_receptor_B1                                                     | NM_002258    | NK activation                     |
| <b>KLRD1</b>    | KLRD1_515619         | killer_cell_lectin_like_receptor_D1                                                     | NM_002262    | Drug target                       |
| <b>KLRF1</b>    | KLRF1_188285         | killer_cell_lectin_like_receptor_F1                                                     | NM_016523    | NK activation                     |
| <b>KLRG1</b>    | KLRG1_410518         | killer_cell_lectin_like_receptor_G1                                                     | NM_005810    | NK activation                     |
| <b>KLRK1</b>    | KLRK1_698804         | killer_cell_lectin_like_receptor_K1                                                     | NM_007360    | NK activation                     |
| <b>KREMEN1</b>  | KREMEN1_128<br>61389 | kringle_containing_transmembrane_protein_1                                              | NM_032045    | Neutrophil                        |
| <b>KRT5</b>     | KRT5_1063116<br>5    | keratin_5                                                                               | NM_000424    | Tumor marker                      |
| <b>KRT7</b>     | KRT7_440543          | keratin_7                                                                               | NM_005556    | Tumor marker                      |
| <b>LAG3</b>     | LAG3_1311141<br>9    | lymphocyte_activating_3                                                                 | NM_002286    | Drug target                       |

|                |                 |                                                     |              |                        |
|----------------|-----------------|-----------------------------------------------------|--------------|------------------------|
| <b>LAMP1</b>   | LAMP1_374485    | lysosomal_associated_membrane_protein_1             | NM_005561    | Lymphocyte infiltrate  |
| <b>LAMP3</b>   | LAMP3_12361344  | lysosomal_associated_membrane_protein_3             | NM_014398    | TCR coexpression       |
| <b>LAPTM5</b>  | LAPTM5_555664   | lysosomal_protein_transmembrane_5                   | NM_006762    | Lymphocyte infiltrate  |
| <b>LCK</b>     | LCK_89192       | LCK_proto-oncogene_Src_family_tyrosine_kinase       | NM_001042771 | TCR coexpression       |
| <b>LCN2</b>    | LCN2_153259     | lipocalin_2                                         | NM_005564    | Innate immune response |
| <b>LEXM</b>    | LEXM_10551156   | lymphocyte_expansion_molecule                       | NM_001110533 | T cell differentiation |
| <b>LILRB1</b>  | LILRB1_15681666 | leukocyte_immunoglobulin_like_receptor_B1           | NM_001081637 | Leukocyte inhibition   |
| <b>LILRB2</b>  | LILRB2_891994   | leukocyte_immunoglobulin_like_receptor_B2           | NM_001080978 | Lymphocyte infiltrate  |
| <b>LMNA</b>    | LMNA_588696     | lamin_A_C                                           | NM_170707    | Housekeeping           |
| <b>LRG1</b>    | LRG1_24131      | leucine_rich_alpha-2-glycoprotein_1                 | NM_052972    | Neutrophil             |
| <b>LRP1</b>    | LRP1_25642670   | LDL_receptor_related_protein_1                      | NM_002332    | Housekeeping           |
| <b>LST1</b>    | LST1_22120      | leukocyte_specific_transcript_1                     | NM_007161    | Leukocyte inhibition   |
| <b>LY9</b>     | LY9_13751476    | lymphocyte_antigen_9                                | NM_002348    | Lymphocyte infiltrate  |
| <b>LYZ</b>     | LYZ_120222      | lysozyme                                            | NM_000239    | Innate immune response |
| <b>M6PR</b>    | M6PR_229336     | mannose-6-phosphate_receptor_cation_dependent       | NM_002355    | T cell regulation      |
| <b>MAD2L1</b>  | MAD2L1_115221   | MAD2_mitotic_arrest_deficient-like_1_yeast          | NM_002358    | Proliferation          |
| <b>MADCAM1</b> | MADCAM1_9291024 | mucosal_vascular_addressin_cell_adhesion_molecule_1 | NM_130760    | Adhesion, migration    |
| <b>MAGEA1</b>  | MAGEA1_22129    | MAGE_family_member_A1                               | NM_004988    | Tumor antigen          |
| <b>MAGEA10</b> | MAGEA10_241320  | MAGE_family_member_A10                              | NM_021048    | Tumor antigen          |

|                |                 |                                                                        |                     |                              |
|----------------|-----------------|------------------------------------------------------------------------|---------------------|------------------------------|
| <b>MAGEA12</b> | MAGEA12_30130   | MAGE_family_member_A12                                                 | NM_005367           | Tumor antigen                |
| <b>MAGEA3</b>  | MAGEA3_20121    | MAGE_family_member_A3                                                  | NM_005362,NM_005363 | Tumor antigen                |
| <b>MAGEA4</b>  | MAGEA4_28131    | MAGE_family_member_A4                                                  | NM_001011548        | Tumor antigen                |
| <b>MAGEC2</b>  | MAGEC2_249358   | MAGE_family_member_C2                                                  | NM_016249           | Tumor antigen                |
| <b>MAPK1</b>   | MAPK1_13241425  | mitogen-activated_protein_kinase_1                                     | NM_002745           | Tumor marker                 |
| <b>MAPK14</b>  | MAPK14_14031511 | mitogen-activated_protein_kinase_14                                    | NM_139012           | Innate immune response       |
| <b>MELK</b>    | MELK_300401     | maternal_embryonic_leucine_zipper_kinase                               | NM_014791           | Proliferation                |
| <b>MIF</b>     | MIF_157270      | macrophage_migration_inhibitory_factor_glycosylation-inhibiting_factor | NM_002415           | Innate immune response       |
| <b>MKI67</b>   | MKI67_581686    | marker_of_proliferation_Ki-67                                          | NM_002417           | Proliferation                |
| <b>MLANA</b>   | MLANA_159265    | melan-A                                                                | NM_005511           | Tumor antigen                |
| <b>MMP2</b>    | MMP2_11051213   | matrix_metallopeptidase_2                                              | NM_004530           | Tumor marker                 |
| <b>MMP9</b>    | MMP9_11741283   | matrix_metallopeptidase_9                                              | NM_004994           | Tumor marker                 |
| <b>MPO</b>     | MPO_15121620    | myeloperoxidase                                                        | NM_000250           | Myeloid marker               |
| <b>MRC1</b>    | MRC1_529634     | mannose_receptor_C_type_1                                              | NM_002438           | Dendritic cell, macrophage   |
| <b>MS4A1</b>   | MS4A1_127232    | membrane_spanning_4-domains_A1                                         | NM_021950           | Drug target                  |
| <b>MTOR</b>    | MTOR_62366338   | mechanistic_target_of_rapamycin                                        | NM_004958           | PD-1 signaling, Tumor marker |
| <b>MX1</b>     | MX1_232336      | MX_dynamin_like_GTPase_1                                               | NM_001178046        | Interferon signaling         |
| <b>MYC</b>     | MYC_510619      | v-myc_avian_myelocytomatosis_viral_oncogene_homolog                    | NM_002467           | Tumor marker                 |

|                 |                  |                                            |              |                              |
|-----------------|------------------|--------------------------------------------|--------------|------------------------------|
| <b>NCAM1</b>    | NCAM1_26012709   | neural_cell_adhesion_molecule_1            | NM_181351    | Adhesion, migration          |
| <b>NCF1</b>     | NCF1_509617      | neutrophil_cytosolic_factor_1              | NM_000265    | Chemokine signaling          |
| <b>NCR1</b>     | NCR1_754861      | natural_cytotoxicity_triggering_receptor_1 | NM_004829    | NK cell marker               |
| <b>NCR3</b>     | NCR3_234342      | natural_cytotoxicity_triggering_receptor_3 | NM_147130    | NK cell marker               |
| <b>NECTIN2</b>  | NECTIN2_13881496 | nectin_cell_adhesion_molecule_2            | NM_001042724 | Adhesion, migration          |
| <b>NFATC1</b>   | NFATC1_27682875  | nuclear_factor_of_activated_T-cells_1      | NM_172387    | PD-1 signaling               |
| <b>NFKBIA</b>   | NFKBIA_734840    | NFKB_inhibitor_alpha                       | NM_020529    | T cell receptor signaling    |
| <b>NKG7</b>     | NKG7_557664      | natural_killer_cell_granule_protein_7      | NM_005601    | Lymphocyte infiltrate        |
| <b>NOS2</b>     | NOS2_91195       | nitric_oxide_synthase_2                    | NM_000625    | Innate immune response       |
| <b>NOTCH3</b>   | NOTCH3_738847    | notch_3                                    | NM_000435    | Tumor marker                 |
| <b>NRP1</b>     | NRP1_14831588    | neuropilin_1                               | NM_003873    | Dendritic cell               |
| <b>NT5E</b>     | NT5E_12531355    | 5-nucleotidase_ecto                        | NM_002526    | Checkpoint pathway           |
| <b>NTN3</b>     | NTN3_12821377    | netrin_3                                   | NM_006181    | B cell marker                |
| <b>OAS1</b>     | OAS1_757865      | 2-5-oligoadenylate_synthetase_1            | NM_016816    | Type II interferon signaling |
| <b>OAS2</b>     | OAS2_15981707    | 2-5-oligoadenylate_synthetase_2            | NM_016817    | Interferon signaling         |
| <b>OAS3</b>     | OAS3_667776      | 2-5-oligoadenylate_synthetase_3            | NM_006187    | Interferon signaling         |
| <b>PDCD1</b>    | PDCD1_143244     | programmed_cell_death_1                    | NM_005018    | Drug target                  |
| <b>PDCD1LG2</b> | PDCD1LG2_315423  | programmed_cell_death_1_ligand_2           | NM_025239    | Checkpoint pathway           |



|                |                 |                                                                       |              |                                 |
|----------------|-----------------|-----------------------------------------------------------------------|--------------|---------------------------------|
| <b>PECAM1</b>  | PECAM1_22132    | platelet_and_endothelial_cell_adhesion_molecule_1                     | NM_000442    | Adhesion, migration             |
| <b>PGF</b>     | PGF_742842      | placental_growth_factor                                               | NM_002632    | Tumor marker                    |
| <b>PIK3CA</b>  | PIK3CA_12781384 | phosphatidylinositol-45-bisphosphate_3-kinase_catalytic_subunit_alpha | NM_006218    | PD-1 signaling,<br>Tumor marker |
| <b>PIK3CD</b>  | PIK3CD_19842095 | phosphatidylinositol-45-bisphosphate_3-kinase_catalytic_subunit_delta | NM_005026    | PD-1 signaling,<br>Tumor marker |
| <b>PMEL</b>    | PMEL_233339     | premelanosome_protein                                                 | NM_006928    | Drug target                     |
| <b>POLR2A</b>  | POLR2A_42334334 | polymerase_RNA_II_subunit_A                                           | NM_000937    | Housekeeping                    |
| <b>POU2AF1</b> | POU2AF1_230337  | POU_class_2_associating_factor_1                                      | NM_006235    | B cell marker                   |
| <b>PRDM1</b>   | PRDM1_484588    | PR_domain_1                                                           | NM_001198    | PD-1 signaling                  |
| <b>PRF1</b>    | PRF1_672778     | perforin_1                                                            | NM_005041    | NK activation                   |
| <b>PSMB9</b>   | PSMB9_384491    | proteasome_subunit_beta_9                                             | NM_002800    | Type II interferon<br>signaling |
| <b>PTEN</b>    | PTEN_19732078   | phosphatase_and_tensin_homolog                                        | NM_000314    | PD-1 signaling,<br>Tumor marker |
| <b>PTGS2</b>   | PTGS2_14761583  | prostaglandin-endoperoxide_synthase_2                                 | NM_000963    | Tumor marker                    |
| <b>PTK7</b>    | PTK7_15161625   | protein_tyrosine_kinase_7_inactive                                    | NM_002821    | Tumor marker                    |
| <b>PTPN11</b>  | PTPN11_14261533 | protein_tyrosine_phosphatase_non-receptor_type_11                     | NM_002834    | PD-1 signaling,<br>Tumor marker |
| <b>PTPN6</b>   | PTPN6_17741884  | protein_tyrosine_phosphatase_non-receptor_type_6                      | NM_080548    | T cell receptor<br>signaling    |
| <b>PTPN7</b>   | PTPN7_471581    | protein_tyrosine_phosphatase_non-receptor_type_7                      | NM_001199797 | Lymphocyte infiltrate           |
| <b>PTPRC</b>   | PTPRC_710817    | protein_tyrosine_phosphatase_receptor_type_C                          | NM_002838    | Lymphocyte infiltrate           |
| <b>PTPRCAP</b> | PTPRCAP_383516  | protein_tyrosine_phosphatase_receptor_type_C_associated_prot<br>ein   | NM_005608    | TCR coexpression                |

|               |                 |                                                                                 |           |                           |
|---------------|-----------------|---------------------------------------------------------------------------------|-----------|---------------------------|
| <b>PVR</b>    | PVR_9571064     | poliovirus_receptor                                                             | NM_006505 | Checkpoint pathway        |
| <b>PYGL</b>   | PYGL_586697     | phosphorylase_glycogen_liver                                                    | NM_002863 | Neutrophil                |
| <b>RB1</b>    | RB1_24592560    | RB_transcriptional_corepressor_1                                                | NM_000321 | Tumor marker              |
| <b>RORC</b>   | RORC_12011307   | RAR_related_orphan_receptor_C                                                   | NM_005060 | Helper T cells            |
| <b>RPS6</b>   | RPS6_124229     | ribosomal_protein_S6                                                            | NM_001010 | Tumor marker              |
| <b>S100A8</b> | S100A8_239334   | S100_calcium_binding_protein_A8                                                 | NM_002964 | Myeloid marker,<br>MDSC   |
| <b>S100A9</b> | S100A9_174280   | S100_calcium_binding_protein_A9                                                 | NM_002965 | Myeloid marker,<br>MDSC   |
| <b>SAMHD1</b> | SAMHD1_19002006 | SAM_and_HD_domain_containing_deoxynucleoside_triphosphate_triphosphohydrolase_1 | NM_015474 | Lymphocyte infiltrate     |
| <b>SDHA</b>   | SDHA_16361735   | succinate_dehydrogenase_complex_flavoprotein_subunit_A                          | NM_004168 | Housekeeping              |
| <b>SELL</b>   | SELL_139245     | selectin_L                                                                      | NM_000655 | Leukocyte migration       |
| <b>SH2D1A</b> | SH2D1A_540642   | SH2_domain_containing_1A                                                        | NM_002351 | Lymphocyte<br>activation  |
| <b>SH2D1B</b> | SH2D1B_173275   | SH2_domain_containing_1B                                                        | NM_053282 | Lymphocyte<br>activation  |
| <b>SIT1</b>   | SIT1_148254     | signaling_threshold_regulating_transmembrane_adaptor_1                          | NM_014450 | Lymphocyte infiltrate     |
| <b>SKAP2</b>  | SKAP2_809912    | src_kinase_associated_phosphoprotein_2                                          | NM_003930 | B cell marker             |
| <b>SLAMF7</b> | SLAMF7_9161020  | SLAM_family_member_7                                                            | NM_021181 | Drug target               |
| <b>SLAMF8</b> | SLAMF8_9071016  | SLAM_family_member_8                                                            | NM_020125 | Lymphocyte infiltrate     |
| <b>SNAI1</b>  | SNAI1_138246    | snail_family_transcriptional_repressor_1                                        | NM_005985 | Tumor marker,<br>stemness |
| <b>SNAI2</b>  | SNAI2_722828    | snail_family_transcriptional_repressor_2                                        | NM_003068 | Tumor marker,<br>stemness |
| <b>SRGN</b>   | SRGN_230328     | serglycin                                                                       | NM_002727 | Lymphocyte infiltrate     |

|               |                 |                                                         |              |                              |
|---------------|-----------------|---------------------------------------------------------|--------------|------------------------------|
| <b>SSX2</b>   | SSX2_233349     | SSX_family_member_2                                     | NM_003147    | Tumor antigen                |
| <b>STAT1</b>  | STAT1_18871996  | signal_transducer_and_activator_of_transcription_1      | NM_007315    | Type II interferon signaling |
| <b>STAT3</b>  | STAT3_17511856  | signal_transducer_and_activator_of_transcription_3      | NM_139276    | Drug target                  |
| <b>STAT4</b>  | STAT4_245352    | signal_transducer_and_activator_of_transcription_4      | NM_003151    | Helper T cells               |
| <b>STAT5A</b> | STAT5A_18501954 | signal_transducer_and_activator_of_transcription_5A     | NM_003152    | Cytokine signaling           |
| <b>STAT6</b>  | STAT6_231339    | signal_transducer_and_activator_of_transcription_6      | NM_003153    | Helper T cells               |
| <b>TAGAP</b>  | TAGAP_10531160  | T-cell_activation_RhoGTPase_activating_protein          | NM_054114    | Lymphocyte infiltrate        |
| <b>TAP1</b>   | TAP1_15701675   | transporter_1_ATP-binding_cassette_sub-family_B_MDR_TAP | NM_000593    | Type II interferon signaling |
| <b>TARP</b>   | TARP_416517     | TCR_gamma_alternate_reading_frame_protein               | NM_001003806 | Lymphocyte infiltrate        |
| <b>TBP</b>    | TBP_259367      | TATA-box_binding_protein                                | NM_003194    | Housekeeping                 |
| <b>TBX21</b>  | TBX21_9251036   | T-box_21                                                | NM_013351    | Type II interferon signaling |
| <b>TCF7</b>   | TCF7_677799     | transcription_factor_7_T-cell_specific_HMG-box          | NM_003202    | Tumor marker                 |
| <b>TDO2</b>   | TDO2_55162      | tryptophan_23-dioxygenase                               | NM_005651    | Checkpoint pathway           |
| <b>TFRC</b>   | TFRC_10891196   | transferrin_receptor                                    | NM_001128148 | Housekeeping                 |
| <b>TGFB1</b>  | TGFB1_13681474  | transforming_growth_factor_beta_1                       | NM_000660    | Checkpoint pathway           |
| <b>TIGIT</b>  | TIGIT_383491    | T-cell_immunoreceptor_with_Ig_and_ITIM_domains          | NM_173799    | TCR coexpression             |
| <b>TLR3</b>   | TLR3_24932595   | toll_like_receptor_3                                    | NM_003265    | Dendritic cell               |
| <b>TLR7</b>   | TLR7_99206      | toll_like_receptor_7                                    | NM_016562    | Innate immune response       |
| <b>TLR8</b>   | TLR8_36137      | toll_like_receptor_8                                    | NM_138636    | Lymphocyte infiltrate        |
| <b>TLR9</b>   | TLR9_619727     | toll_like_receptor_9                                    | NM_017442    | Drug target                  |

|                 |                 |                                                      |           |                       |
|-----------------|-----------------|------------------------------------------------------|-----------|-----------------------|
| <b>TNF</b>      | TNF_450555      | tumor_necrosis_factor                                | NM_000594 | Checkpoint pathway    |
| <b>TNFAIP8</b>  | TNFAIP8_188295  | TNF_alpha_induced_protein_8                          | NM_014350 | Lymphocyte infiltrate |
| <b>TNFRSF14</b> | TNFRSF14_846950 | tumor_necrosis_factor_receptor_superfamily_member_14 | NM_003820 | Checkpoint pathway    |
| <b>TNFRSF17</b> | TNFRSF17_254359 | tumor_necrosis_factor_receptor_superfamily_member_17 | NM_001192 | B cell marker         |
| <b>TNFRSF18</b> | TNFRSF18_348456 | tumor_necrosis_factor_receptor_superfamily_member_18 | NM_004195 | Drug target           |
| <b>TNFRSF4</b>  | TNFRSF4_304389  | tumor_necrosis_factor_receptor_superfamily_member_4  | NM_003327 | Drug target           |
| <b>TNFRSF9</b>  | TNFRSF9_894998  | tumor_necrosis_factor_receptor_superfamily_member_9  | NM_001561 | Drug target           |
| <b>TNFSF10</b>  | TNFSF10_251357  | tumor_necrosis_factor_superfamily_member_10          | NM_003810 | Apoptosis             |
| <b>TNFSF13B</b> | TNFSF13B_774879 | tumor_necrosis_factor_superfamily_member_13b         | NM_006573 | B cell marker         |
| <b>TNFSF14</b>  | TNFSF14_224334  | tumor_necrosis_factor_superfamily_member_14          | NM_003807 | Checkpoint pathway    |
| <b>TNFSF18</b>  | TNFSF18_128228  | tumor_necrosis_factor_superfamily_member_18          | NM_005092 | Checkpoint pathway    |
| <b>TNFSF4</b>   | TNFSF4_347439   | tumor_necrosis_factor_superfamily_member_4           | NM_003326 | Checkpoint pathway    |
| <b>TNFSF9</b>   | TNFSF9_325412   | tumor_necrosis_factor_superfamily_member_9           | NM_003811 | Cytokine signaling    |
| <b>TOP2A</b>    | TOP2A_27522855  | topoisomerase_DNA_II_alpha                           | NM_001067 | Proliferation         |
| <b>TP63</b>     | TP63_143246     | tumor_protein_p63                                    | NM_003722 | Tumor marker          |
| <b>TRIM29</b>   | TRIM29_882990   | tripartite_motif_containing_29                       | NM_012101 | Tumor marker          |
| <b>TUBB</b>     | TUBB_369479     | tubulin_beta_class_I                                 | NM_178014 | Housekeeping          |

|               |                 |                                                               |              |                           |
|---------------|-----------------|---------------------------------------------------------------|--------------|---------------------------|
| <b>TWIST1</b> | TWIST1_9291033  | twist_family_bHLH_transcription_factor_1                      | NM_000474    | Tumor marker, stemness    |
| <b>TYROBP</b> | TYROBP_350455   | TYRO_protein_tyrosine_kinase_binding_protein                  | NM_198125    | Lymphocyte infiltrate     |
| <b>VCAM1</b>  | VCAM1_829933    | vascular_cell_adhesion_molecule_1                             | NM_001078    | Leukocyte migration       |
| <b>VEGFA</b>  | VEGFA_17121817  | vascular_endothelial_growth_factor_A                          | NM_001171623 | Chemokine signaling       |
| <b>VTCN1</b>  | VTCN1_49157     | V-set_domain_containing_T_cell_activation_inhibitor_1         | NM_024626    | Checkpoint pathway        |
| <b>XAGE1B</b> | XAGE1B_469547   | X_antigen_family_member_1B                                    | NM_001097594 | Tumor antigen             |
| <b>ZAP70</b>  | ZAP70_673781    | zeta_chain_of_T_cell_receptor_associated_protein_kinase_70kDa | NM_001079    | T cell receptor signaling |
| <b>ZBTB46</b> | ZBTB46_13361440 | zinc_finger_and_BTBD_domain_containing_46                     | NM_025224    | Dendritic cell            |
| <b>ZEB1</b>   | ZEB1_74175      | zinc_finger_E-box_binding_homeobox_1                          | NM_001174093 | Tumor marker, stemness    |
